# Supplementary material for: Plasma exo-hsa_circRNA_0056616: A potential biomarker for lymph node metastasis in lung adenocarcinoma
Source: PubMed Central journal article supplement (PMC7196257; doi:10.7150/jca.30360), 2020-04-06
Supplement: jcav11p4037s1.pdf [file jcav11p4037s1.pdf]

Figure S1. Expression levels of CXCR4 detected in lung adenocarcinoma tissues. (A) Western blot analysis was used to detect expression levels of CXCR4. Detection of actin served as a loading control. The sample number labels shown in black and red represent samples from patients with and without lymph node metastasis, respectively. (B) Quantitation of CXCR4 levels (median, [P<sub>25</sub>-P<sub>75</sub>]) according to metastasis.

Figure S2. Validation of a PC-9 stable cell line expressing low levels of CXCR4. (A) PCR amplification of CXCR4-shRNA cassettes in: (1) negative control (ddH<sub>2</sub>O); (2) DNA marker; and (3-8) CXCR4-shRNA clones 3-8 samples. (B) Sequencing of a representative PCR product from A. (C) Detection of *CXCR4* mRNA in the PC-9/CXCR4 stable cell line with and without shRNA silencing as indicated (\*P < 0.01). (D) Cell morphology (magnification, 100×) was observed by microscope and confocal microscope. GFP imaging was performed to confirm expression of the infecting lentiviruses. (E) Western blotting was performed to detect expression of CXCR4 in the cell lines indicated. Detection of GAPDH was included as a loading control. (F) Expression of *CXCR4* mRNA was detected in RT-qPCR assays of the indicated cell groups. PC9-KD: PC-9/CXCR4-shRNA1 group; PC9-C: PC-9/shCtrl group; PC9: untransfected PC-9 group. \* P < 0.001.

Figure S3. Effect of *CXCR4* silencing on various phenotypes of the PC14 cell line. Low levels of CXCR4 expression were compared with higher levels of CXCR4

expression in: (A) soft agar colony formation assays, (B) wound healing assays, and (C) transwell assays. These assays were performed to evaluate colony formation, cell migration, and cell invasion, for the PC14 cell groups indicated, respectively. In panel C, crystal violet stained cells (at left) and the corresponding quantitation of these stained cells (at right) indicate the number of invasion cells for each group. PC14-KD: PC14/CXCR4-shRNA1 group; PC14-C: PC14/shCtrl group; PC14: untransfected PC14 group.

Table S1. ShRNA sequences for targeting *CXCR4*

Table S2. Sequences of the primers used in RT-qPCR assays.

Table S3. *CXCR4*-related circRNAs identified in database search



**Figure S2**

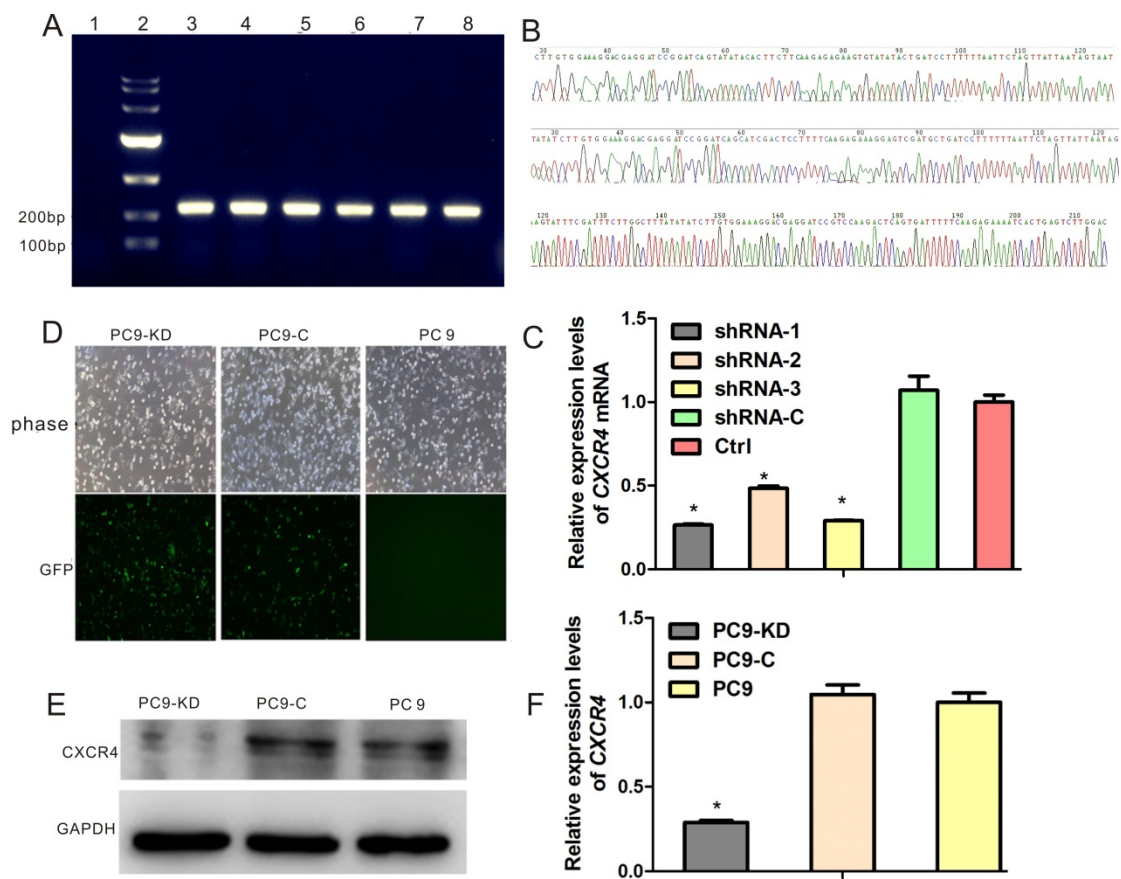

Figure S3

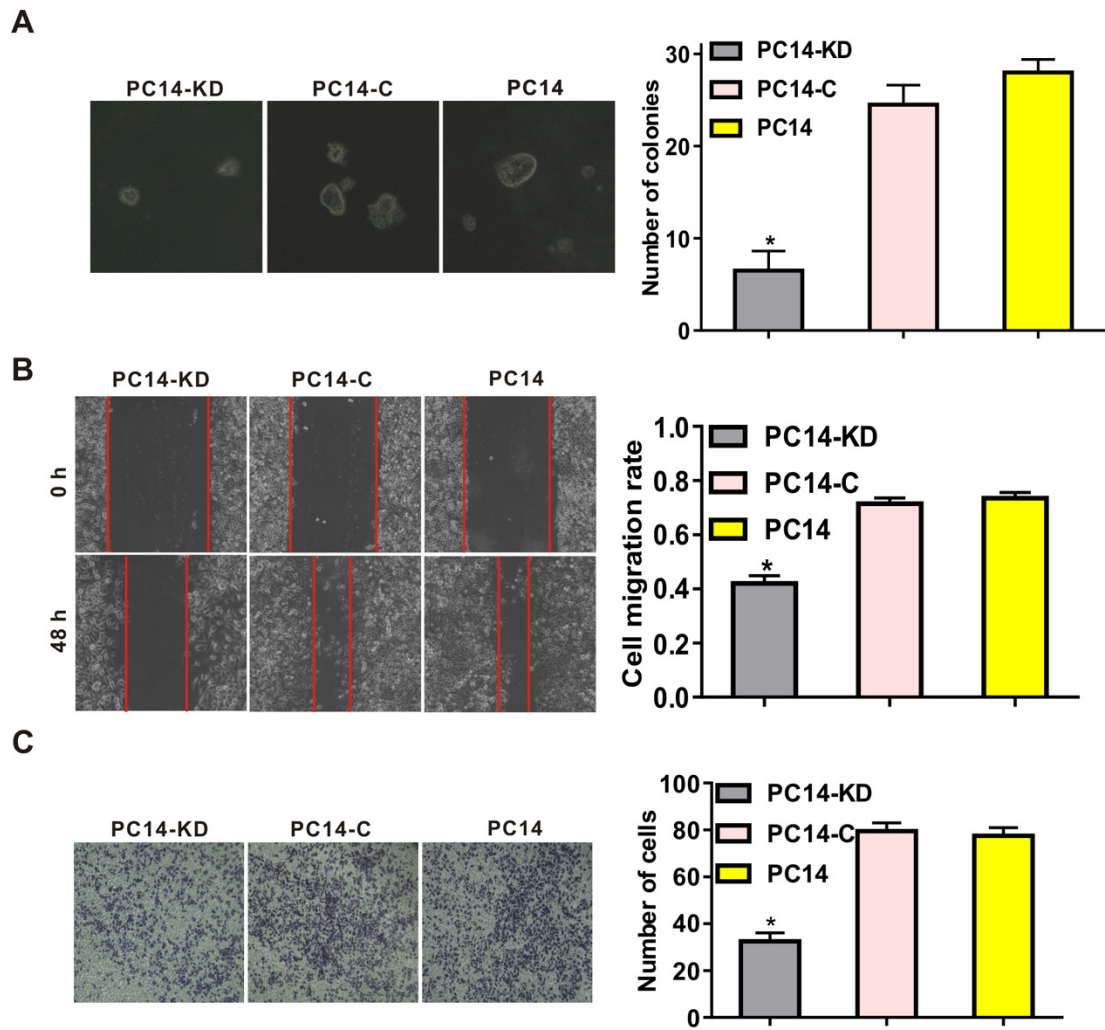

Table S1. ShRNA sequences for targeting *CXCR4*

| Primer name | Orientation | Sequence (5'→3')                                            |
|-------------|-------------|-------------------------------------------------------------|
| shRNA1      | Forward     | gatccGGATCAGCATCGACTCCTTTTCAAGAGAAAGGAGTCGATGCTGATCCTTTTTTg |
|             | Reverse     | aattcAAAAAAGGATCAGCATCGACTCCTTTCTCTTGAAAAGGAGTCGATGCTGATCCg |
| shRNA2      | Forward     | gatccGGATCAGTATATACACTTCTTCAAGAGAGAAGTGTATATACTGATCCTTTTTTg |
|             | Reverse     | aattcAAAAAAGGATCAGTATATACACTTCTCTCTTGAAGAAGTGTATATACTGATCCg |
| shRNA3      | Forward     | gatccGCAAGGCAGTCCATGTCATTTCAAGAGAATGACATGGACTGCCTTGCTTTTTTg |
|             | Reverse     | aattcAAAAAAGCAAGGCAGTCCATGTCATTCTCTTGAAATGACATGGACTGCCTTGCg |
| shRNAc      | Forward     | ccggTCTTCGACATTTAACCAATTTCAAGAGAATTGGTTAAATGTCGAAGCTTTTTTg  |

Table S2. Sequences of the primers used in qRT-PCR assays.

| Gene                |         | Sequence (5'→3')        |
|---------------------|---------|-------------------------|
| <i>CXCR4</i>        | Forward | GGAGAGTTGTAGGATTCTAC    |
|                     | Reverse | CCTCGGTGTAGTTATCTGAAG   |
| <i>GAPDH</i>        | Forward | GGCGATGCTGGCGCTGAGTAC   |
|                     | Reverse | GAGGCTGTTGTCATACTTCTC   |
| hsa_circRNA_0056616 | Forward | TTTTGCCTCAGAGCATACCT    |
|                     | Reverse | GTCTTTGTTCTTTACTTCTCCCA |

Table S3. CXCR4-related circRNAs identified in database search

| CircRNA ID       | Genomic length (bp) | Spliced length (bp) | Scores | Repeats | Annotation                                                          |
|------------------|---------------------|---------------------|--------|---------|---------------------------------------------------------------------|
| has_circ_0056615 | 3389                | 3389                | NA     | NA      | ALT_ACCEPTOR.CDS.coding, OVCOED, OVEXON, upstream_start, UTR3, UTR5 |
| has_circ_0056616 | 3807                | 1674                | NA     | NA      | ANNOTATED.CDS.coding, OVCOED, OVEXON, UTR3, UTR5                    |
| has_circ_0117403 | 253                 | 253                 | 3      | NA      | ALT_ACCEPTOR.ALT_DONOR., CDS.coding, INTERNAL, OVCOED, OVEXON, UTR3 |

NA: not available
